# Supplementary material
Source: publisher figshare collection journal article supplement (https://osapublishing.figshare.com/ndownloader/files/27853641)
Supplement: Supplementary file 1 [file 27853641]

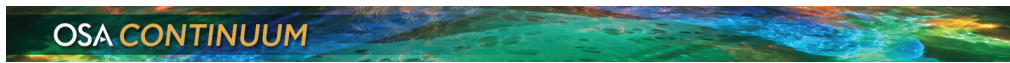

## Fiber Bragg grating-electromagnetically induced transparent fast optical switch: supplement

**NARGES SHAFII MOUSAVI,<sup>1</sup> PARVIZ PARVIN,<sup>1,\*</sup> AND MARYAM ILCHI-GHAZANI<sup>2</sup>** 

<sup>1</sup>Photonics Engineering Group, Physics Dept., Amirkabir University of Technology, P.O. Box 15875-4413, Tehran, Iran

<sup>2</sup>Photonics and Quantum Technologies Research School, Nuclear Science and Technology Research Institute (NSTRI), P.O. Box 14399-51113, Tehran, Iran

\*[parvin@aut.ac.ir](mailto:parvin@aut.ac.ir)

---

This supplement published with The Optical Society on 3 May 2021 by The Authors under the terms of the [Creative Commons Attribution 4.0 License](https://creativecommons.org/licenses/by/4.0/) in the format provided by the authors and unedited. Further distribution of this work must maintain attribution to the author(s) and the published article's title, journal citation, and DOI.

Supplement DOI: <https://doi.org/10.6084/m9.figshare.14464449>

Parent Article DOI: <https://doi.org/10.1364/OSAC.415468>

## Supplementary section:

### 1. EIT Formalism

In the case of laser exposure, the Hamiltonian of  $\Lambda$ -type atoms is given by [50, 51, 55]:

$$H = -\frac{\hbar}{2} \begin{bmatrix} 0 & 0 & \Omega_p \\ 0 & -2(\Delta_p - \Delta_c) & \Omega_c \\ \Omega_p & \Omega_c & -2\Delta_p \end{bmatrix} \quad (1)$$

Note that  $(\Delta_p - \Delta_c)$  is the total detuning parameter.

The density operator  $\rho$  consists of all state dynamics of the laser driven atomic system. The time-dependent density matrix equation is described by the Liouville equation, namely [45, 48, 49, 51]:

$$\frac{\partial \rho}{\partial t} = -\frac{i}{\hbar} [H, \rho] - i\hbar \Gamma \rho \quad (2)$$

where,  $\Gamma$  is the matrix of the damping coefficients. Then, density matrix elements can be obtained according to the following differential equations [48, 51]:

$$\dot{\rho}_{12} = i\rho_{32}\Omega_p - i\rho_{13}\Omega_c + \rho_{12}(i(\Delta_p - \Delta_c) - \gamma_{21}) \quad (3)$$

$$\dot{\rho}_{13} = i(\rho_{33} - \rho_{11})\Omega_p - i\rho_{12}\Omega_c + \rho_{13}i(\Delta_p - \gamma_{31}) \quad (4)$$

$$\dot{\rho}_{32} = i(\rho_{33} - \rho_{22})\Omega_c + i\rho_{21}\Omega_p - \rho_{32}i(\Delta_c + \gamma_{32}) \quad (5)$$

Including the following conditions [48, 51]:

$$\rho_{ij} = \rho_{ji}^* \quad (6)$$

$$\rho_{11} + \rho_{22} + \rho_{33} = 1 \quad (7)$$

Here, the total decay rates are added phenomenologically in the density matrix equations. On the other hand, the steady-state condition leads to simplifying the relations, such that  $\dot{\rho}_{13} = \dot{\rho}_{12} = \dot{\rho}_{23} = 0$  or in the case of the weak probe laser ( $\frac{\Omega_p}{\Omega_c} \ll 1$ ), considering  $|1\rangle$  as an initial state, the atomic population remains almost invariant in this state

implying  $\rho_{11} \cong 1$ , and because of continuity principle ( $\rho_{11} + \rho_{22} + \rho_{33} = 1$ ) then  $\rho_{22} \approx \rho_{33} \approx 0$ . Thus, the steady state solution is obtained as below [48, 51]:

$$\rho_{31} = \Omega_p \frac{-(\Delta_p - \Delta_c) - i\gamma_{21}}{\Omega_c^2 + (\gamma_{31} - i\Delta_p)(\gamma_{21} + i(\Delta_p - \Delta_c))} \quad (8)$$

Moreover, the time-dependence solution for  $\rho_{12}$  and  $\rho_{31}$  are given as below [50, 65]:

$$\rho_{12} = -\frac{i\Omega_c e^{i\Delta_c t}}{\gamma_{21} + i2(\Delta_c - \Delta_p)} \rho_{13} \quad (9)$$

$$\rho_{31} = -\frac{i\Omega_p e^{i\Delta_p t}}{(\gamma_{31} + i2\Delta_p)} + \frac{i\Omega_c e^{i\Delta_c t}}{(\gamma_{31} + i2\Delta_p)} \rho_{21} \quad (10)$$

Meanwhile, the polarization of the atomic medium induced by the applied field is given by [50, 66]:

$$P(z) = N/V (\mu_{13}\rho_{13}e^{-i\omega_{31}t} + \mu_{23}\rho_{23}e^{-i\omega_{32}t} + c.c) \quad (11)$$

Where, N is the density of the EIT nanocrystals in volume V.

In general, the linear susceptibility contains most of the important features of EIT [50, 55, 65]:

$$\chi = \chi' + i\chi'' \quad (12)$$

Where,  $\chi'$  and  $\chi''$  are real and imaginary parts of susceptibility  $\chi = \chi' + i\chi''$ , correlated to the phase shift per unit length and the absorption coefficient of the pulsed laser field, respectively.

The real and imaginary parts of the susceptibility are [51]:

$$\text{Im}(\chi) = \frac{N\mu_{13}^2}{\epsilon_0\hbar} \frac{\gamma_{31}(\gamma_{21}^2 + (\Delta_p - \Delta_c)^2) + \gamma_{21}\Omega_c^2}{(\Omega_c^2 + \gamma_{31}\gamma_{21} - \Delta_p(\Delta_p - \Delta_c))^2 + (\Delta_p\gamma_{21} + (\Delta_p - \Delta_c)\gamma_{31})^2} \quad (13)$$

$$\text{Re}(\chi) = \frac{N\mu_{13}^2}{\epsilon_0\hbar} \frac{(\Delta_p - \Delta_c)(\Delta_p(\Delta_p - \Delta_c) - \Omega_c^2) + \Delta_p\gamma_{21}^2}{(\Omega_c^2 + \gamma_{31}\gamma_{21} - \Delta_p(\Delta_p - \Delta_c))^2 + (\Delta_p\gamma_{21} + (\Delta_p - \Delta_c)\gamma_{31})^2} \quad (14)$$

## 2. Steps of model

Fig. S.1 summarizes the sequential modeling steps of EIT doped FBG as a fast optical switch.

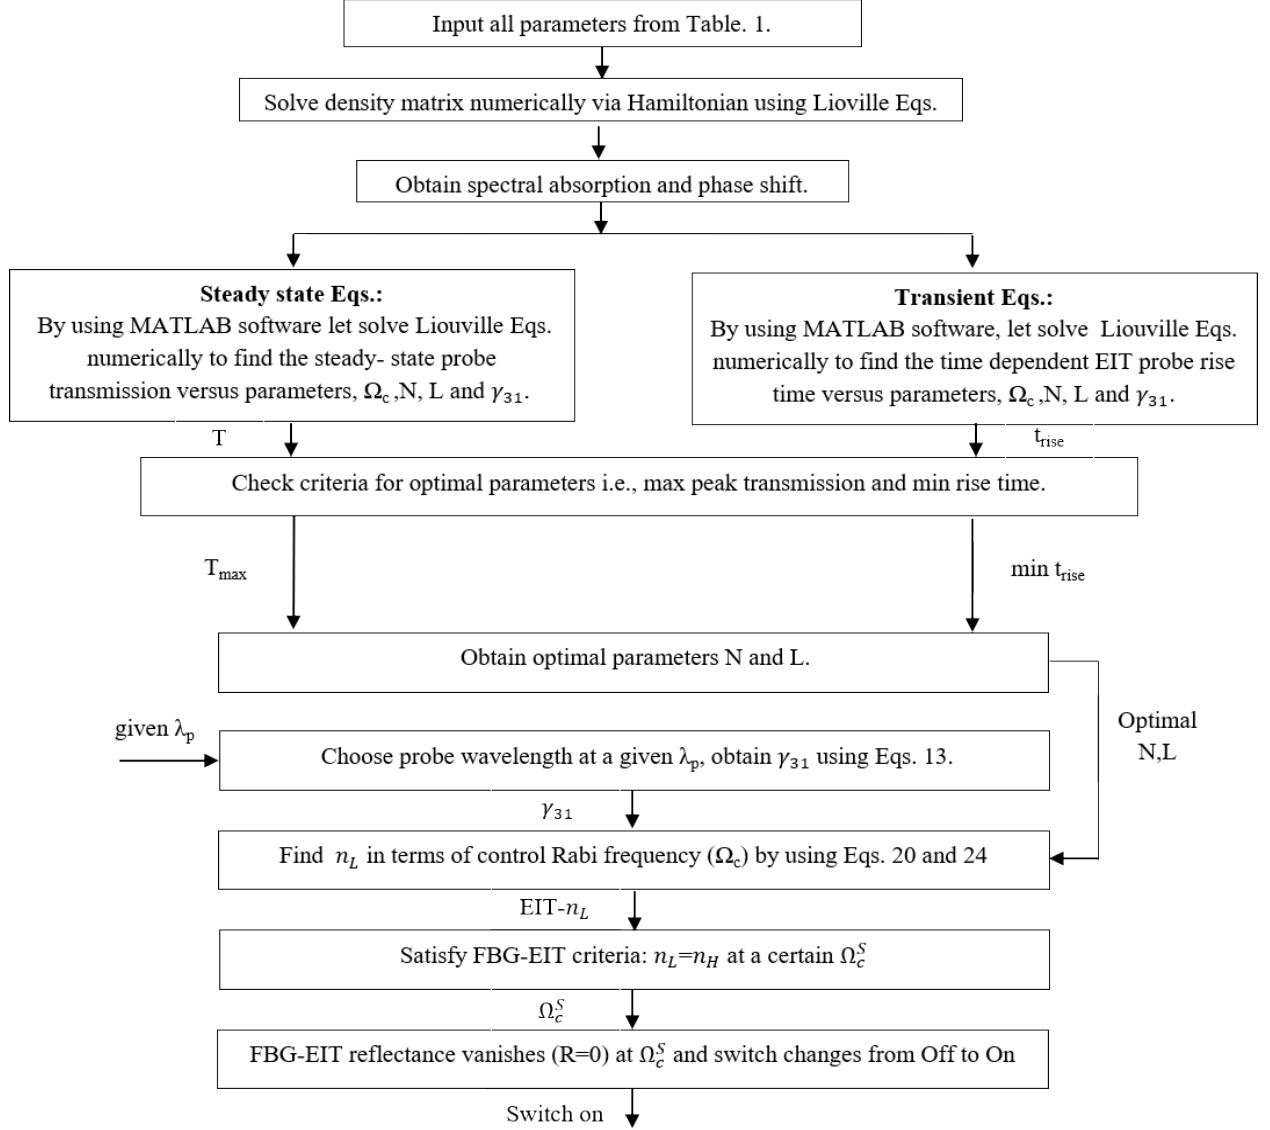

Fig. S.1. Sequential steps to model EIT doped FBG as a fast optical switch to find optimal parameters ( $\Omega_c$ ,  $N$ ,  $L$  and  $\gamma_{31}$ ) based on the criteria: max peak transmission, min rise time where FBG-EIT satisfies  $n_L = n_H$  condition at  $\Omega_c = \Omega_c^S$
